# Supplementary material for: Circulating Irisin Is Reduced in Male Patients with Type 1 and Type 2 Myotonic Dystrophies
Source: PubMed Central journal article supplement (PMC5694592; doi:10.3389/fendo.2017.00320), 2017-11-14
Supplement: table_1.pdf [file table_1.pdf]

**Supplemental Table 1.** Routine echocardiographic parameters in DM patients.

|                               | <b>DM1</b> | <b>DM2</b> | <b>P</b>     |
|-------------------------------|------------|------------|--------------|
| LVIDd, cm                     | 4.8±0.4    | 4.7±0.4    | 0.850        |
| LVIDs, cm                     | 3.2±0.5    | 3.2±0.5    | 0.816        |
| FS,%                          | 32.3±7.4   | 33.3±6.7   | 0.745        |
| RWT, mm                       | 0.40±0.08  | 0.44±0.08  | 0.205        |
| LVMI index, g/cm <sup>2</sup> | 89.0±18.2  | 103.9±30.0 | 0.101        |
| LVEF, %                       | 60.2±7.3   | 57.3±8.2   | 0.350        |
| IVSd, mm                      | 0.98±0.16  | 1.10±0.13  | 0.073        |
| IVSs, mm                      | 1.29±0.23  | 1.51±0.20  | <b>0.018</b> |
| E/A ratio                     | 1.34±0.40  | 1.04±0.26  | 0.08         |

LVIDd: left ventricular internal diameter in diastole; LVIDs: left ventricular internal diameter in systole; FS: fractional shortening; RWT: relative wall thickness; LVMI index: left ventricular mass index; LVEF: left ventricular ejection fraction; IVSd: diastolic interventricular septal thickness; IVSs: systolic interventricular septal thickness; E/A, early (E) to late (A) ventricular filling velocities.
